# Supplementary material for: Analyzing Longitudinal Health Screening Data with Feature Ensemble and Machine Learning Techniques: Investigating Diagnostic Risk Factors of Metabolic Syndrome for Chronic Kidney Disease Stages 3a to 3b
Source: MDPI journal article supplement (doi:10.3390/diagnostics14080825), 2024-04-17
Supplement: s1 [file s1]

**Supplement:**Table S1. The demographics of the 19 variables from the subjects' latest examination ( $V_i, C$ )

| Variable | Mean(SD)       | Variable | Mean(SD)       |
|----------|----------------|----------|----------------|
| BF       | 30.32 ± 6.99   | MCV      | 43.19 ± 4.34   |
| BMI      | 27.19 ± 3.29   | RBCs     | 4.84 ± 0.54    |
| BUN      | 18.54 ± 4.74   | r-GT     | 38.95 ± 45.14  |
| DBP      | 84.30 ± 12.50  | SBP      | 138.18 ± 20.54 |
| FPG      | 123.20 ± 34.35 | SGOT     | 28.61 ± 13.88  |
| Hb       | 14.48 ± 1.47   | SGPT     | 34.19 ± 21.16  |
| HC       | 99.28 ± 6.22   | TG       | 194.49 ± 78.31 |
| HDL      | 47.36 ± 9.98   | UA       | 7.43 ± 1.64    |
| IOP      | 14.56 ± 3.34   | WC       | 90.21 ± 8.50   |
| LDL      | 123.30 ± 34.39 |          |                |
